# Supplementary material for: USP29-mediated HIF1α stabilization is associated with Sorafenib resistance of hepatocellular carcinoma cells by upregulating glycolysis
Source: PubMed Central journal article supplement (PMC8285469; doi:10.1038/s41389-021-00338-7), 2021-07-16
Supplement: 41389_2021_338_MOESM1_ESM.pdf [file 41389_2021_338_MOESM1_ESM.pdf]

## Supplementary Information

### USP29-mediated HIF1 $\alpha$ stabilization promotes Sorafenib resistance of hepatocellular carcinoma cells by upregulating glycolysis

Ruize Gao, David Buechel, Ravi K.R. Kalathur, Marco F. Morini, Mairene Coto-Llerena, Ercan Caner, Salvatore Piscuoglio, Qian Chen, Tanja Blumer, Xueya Wang, Eva Dazert, Markus H. Heim, Michael N. Hall, Fengyuan Tang, and Christofori Gerhard

## Supplementary Figures

Suppl. Figure 1, Gao et al.

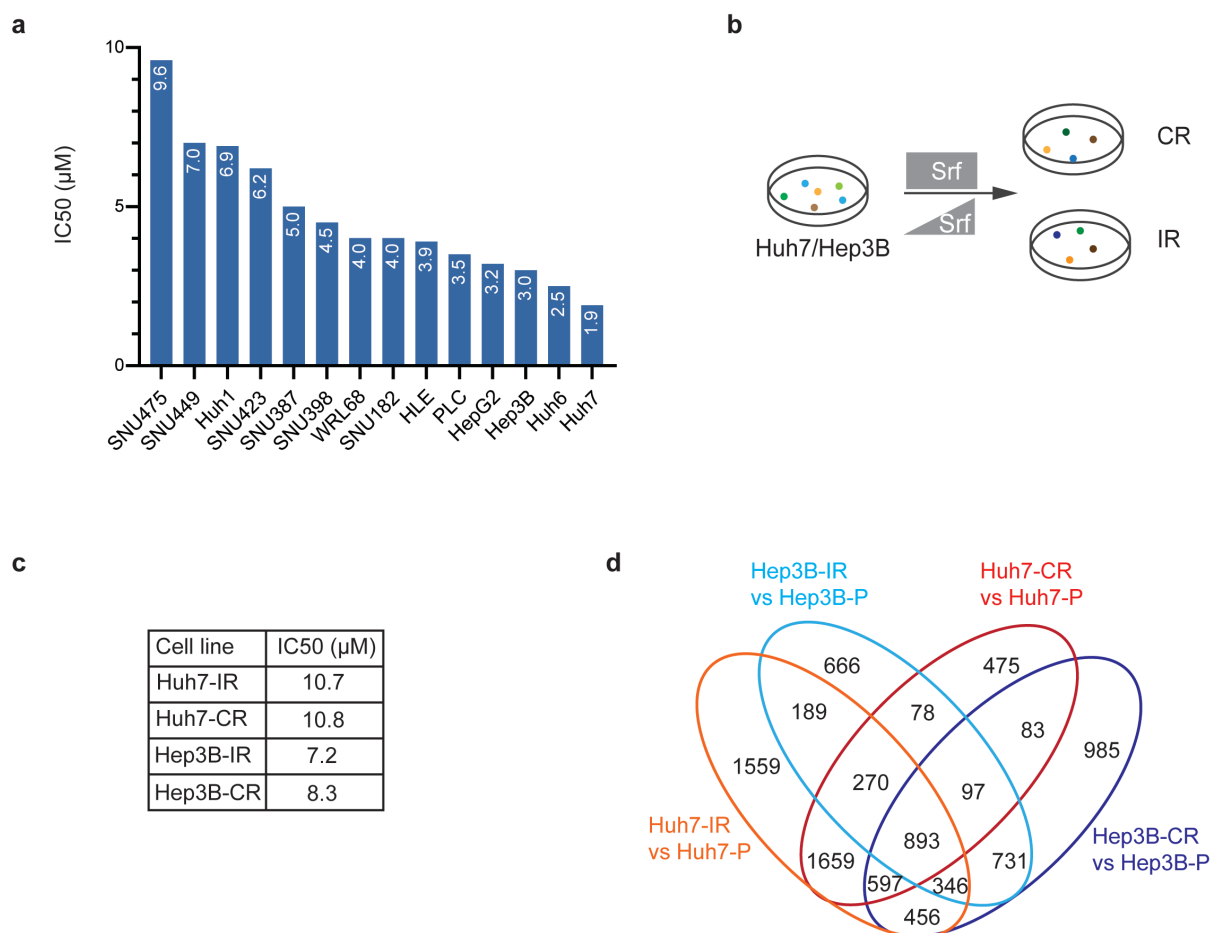

**Supple. Figure 1. Establishment of Sorafenib-resistant cell lines and RNA sequencing.**

- (a)** IC<sub>50</sub> for Sorafenib responsiveness of different HCC cell lines. Different patient-derived HCC cell lines were treated with increasing doses of Sorafenib, and the IC<sub>50</sub> values for cell growth inhibition by Sorafenib were determined. Hep3B and Huh7 were selected as two Sorafenib-responsive and HLE and SNU 398 as moderate Sorafenib-resistant HCC cell lines.
- (b)** Schematic representation of the establishment of Sorafenib-resistant derivatives of Huh7 and Hep3B HCC cell lines. Huh7 or Hep3B cells were treated with increasing or with consistently high concentration Sorafenib to establish acquired Sorafenib-resistant cell lines.
- (c)** Sorafenib IC<sub>50</sub> values of Huh7-IR, Huh7-CR and Hep3B-IR and Hep3B-CR. These IC<sub>50</sub> values are fairly close to Sorafenib's clinically relevant concentration of 10 $\mu$ M.
- (d)** Differential gene expression between the four Sorafenib-resistant cell lines and their Sorafenib-responsive ancestors. The Venn diagram shows the numbers of genes that are differentially expressed between individual parental and Sorafenib resistant cells and the number of genes which are changing with Sorafenib in several or all of the cell lines.

Suppl. Figure 2, Gao et al.

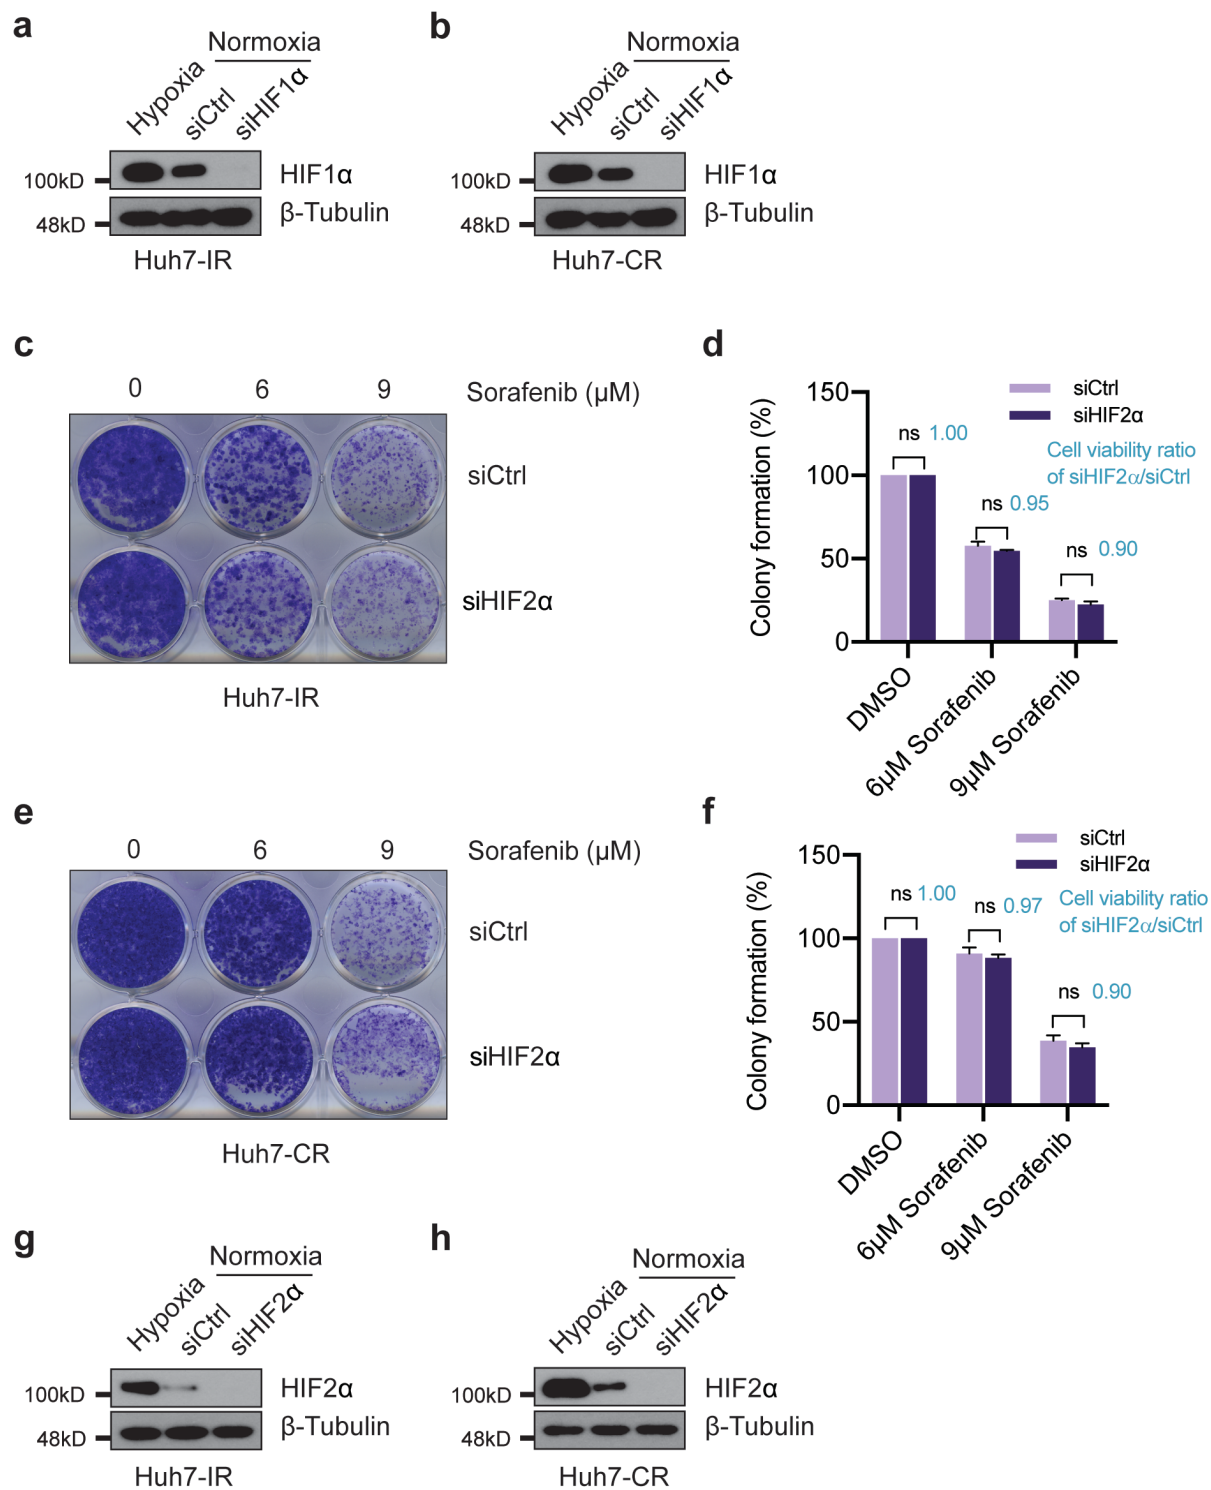

**Suppl. Figure 2. HIF2 $\alpha$  is not required for Sorafenib resistance.**

**(a,b)** Validation of knockdown of HIF1 $\alpha$  with ON-TARGET siHIF1 $\alpha$  in Sorafenib-resistant Huh7-IR (a) and Huh7-CR (b) cells. Huh7-IR and Huh7-CR cells were transfected with siCtrl or ON-TARGET siHIF1 $\alpha$ , and knockdown efficiency was validated by immunoblotting. Culture of the cells in hypoxia was used as a positive control for high HIF1 $\alpha$  expression.  $\beta$ -Tubulin was used as loading control. Results represent three independent experiments.

**(c-f)** HIF2 $\alpha$ 's loss of function has no effect on cell death with Sorafenib treatment. Huh7-IR (c) or Huh7-CR (e) cells were transfected with siCtrl or siHIF2 $\alpha$  and treated with DMSO or with 6 $\mu$ M or 9 $\mu$ M Sorafenib for 2 weeks. Colony formation assays (c,e) and quantification of colony formation by crystal violet staining (d,f) did not reveal any effect on colony formation by the siRNA-mediated depletion of HIF2 $\alpha$ . The ratio of cell viability between HIF2 $\alpha$ -deficient and HIF2 $\alpha$ -wildtype cells is given in blue numbers (d,f).  $n = 3$  independent replicates. ns = not significant; Student's t-test.

**(g,h)** Validation of knockdown of HIF2 $\alpha$  with ON-TARGET siHIF2 $\alpha$  in Huh7-IR (g) and Huh7-CR (h) cells. Huh7-IR and Huh7-CR cells were transfected with siCtrl or ON-TARGET siHIF2 $\alpha$ , and knockdown efficiency was validated by immunoblotting. Culture in hypoxia was used as a positive control.  $\beta$ -Tubulin was used as loading control. Results represent three independent experiments.

## Suppl. Figure 3, Gao et al.

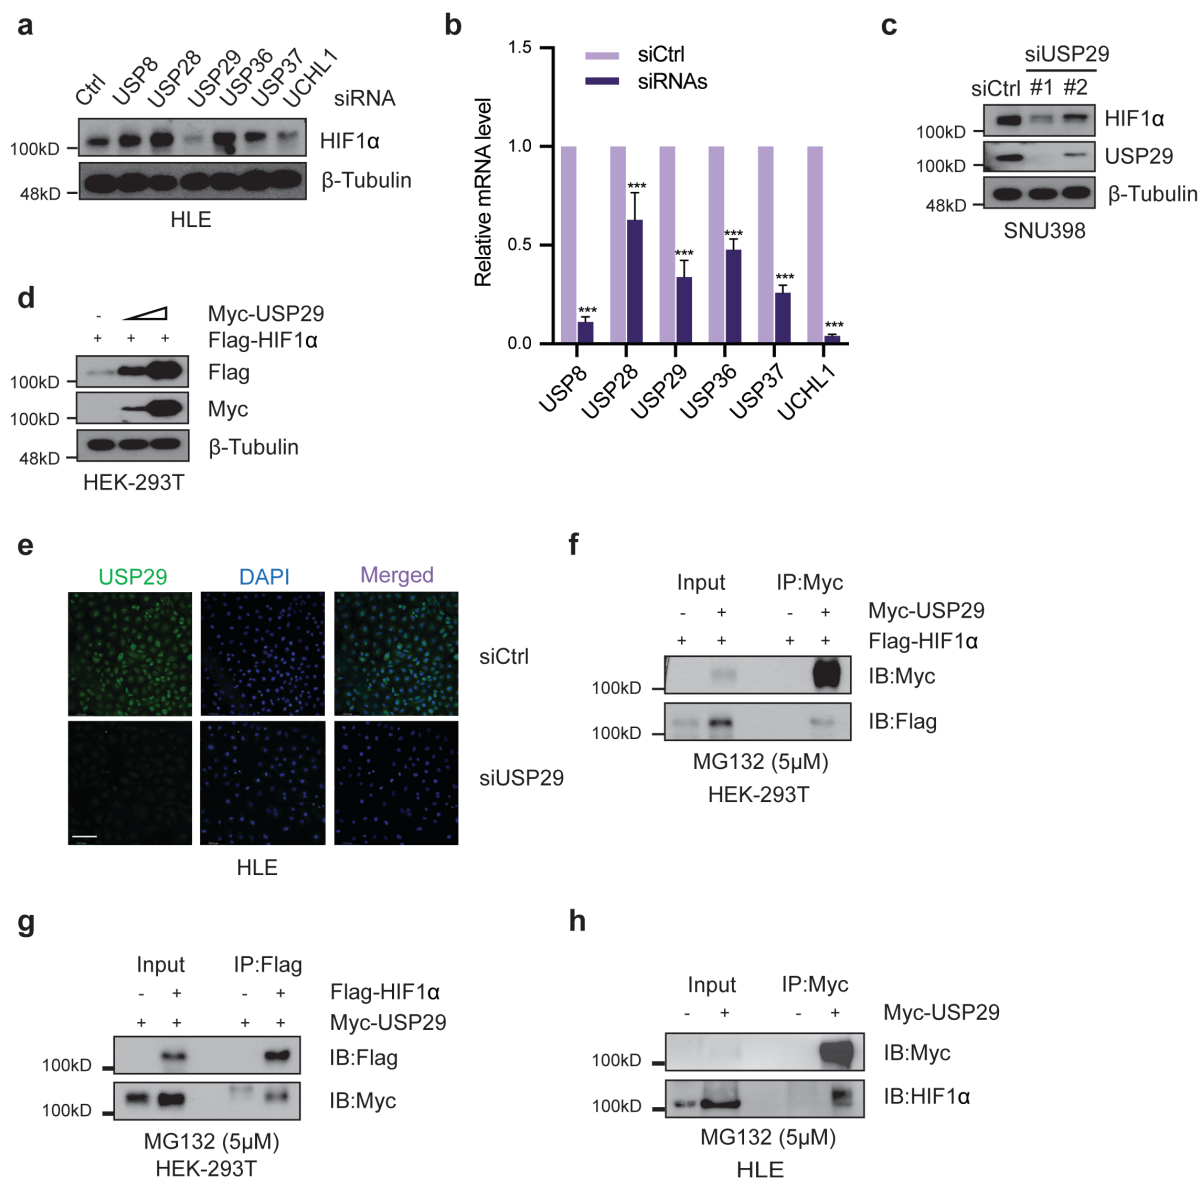**Suppl. Figure 3. USP29 has a positive correlation with HIF1α.**

**(a)** Identification of USP29 as a DUB of HIF1α. A mini-screen with siRNAs against a selected panel of DUBs in Sorafenib-resistant HLE cells revealed that USP29 is one of the most critical players in stabilizing HIF1α protein, as revealed by immunoblotting for HIF1α. Immunoblotting for β-Tubulin was used as loading control. Results represent three independent experiments.

**(b)** Knockdown efficiencies of the siRNAs used in (a). Different ON-TARGET siRNAs targeting USP8, USP28, USP29, USP36, USP37, UCHL1 were transfected into HLE cells, and quantitative RT-PCR analysis were conducted to determine knock down efficiencies. n = 2 independent replicates. \*\*, P < 0.01; \*\*\*, P < 0.001; Student's t-test.

**(c)** Loss of USP29 results in instability of HIF1 $\alpha$  protein in Sorafenib-resistant SNU398 cells. Two distinct siRNAs against USP29 (siUSP29#1 and siUSP29#2) were transfected into SNU398 cells and the protein levels of HIF1 $\alpha$ , and USP29 was determined by immunoblotting analysis. Immunoblotting for  $\beta$ -Tubulin was used as loading control. Results represent three independent experiments.

**(d)** USP29 stabilizes HIF1 $\alpha$ . HEK-293T cells were transfected with a plasmid encoding for Flag-HIF1 $\alpha$  together with increasing amounts of plasmid encoding for Myc-USP29. HIF1 $\alpha$  and USP29 protein levels were determined by immunoblotting against Flag (Flag-HIF1 $\alpha$ ) and Myc (Myc-USP29). Immunoblotting for  $\beta$ -Tubulin was used as loading control. Results represent three independent experiments.

**(e)** Knockdown efficiency of siUSP29 expression. HLE cells were transfected with siCtrl and ON-TARGET siUSP29 and the expression and localization of USP29 was monitored by immunofluorescence microscopy analysis. DAPI was used to visualize nuclei. Results represent three independent experiments. Scale bar, 132.5 $\mu$ m.

**(f)** Myc-tagged USP29 binds Flag-tagged HIF1 $\alpha$ . A plasmid encoding Flag-HIF1 $\alpha$  was transfected into HEK-293T cells together with a plasmid encoding Myc-USP29. Anti-Flag antibodies were used to precipitate (IP) Flag-tagged HIF1 $\alpha$ , and the immunoprecipitates were immunoblotted (IB) for Flag (Flag-HIF1 $\alpha$ ) and for Myc (Myc-USP29). Input represents 1/10 of the lysate used for the immunoprecipitations. Results represent three independent experiments. The proteasome inhibitor MG132 (5 $\mu$ M) was added in these experiments to prevent protein degradation.

**(g)** Flag-tagged HIF1 $\alpha$  binds Myc-tagged USP29. A plasmid encoding for Myc-tagged USP29 was transfected into HEK-293T cells together with a plasmid coding for Flag-tagged HIF1 $\alpha$ . Anti-Myc antibodies were used to precipitate (IP) Myc-tagged USP29, and the immunoprecipitates were immunoblotted (IB) for Myc (Myc-USP29) and for Flag (Flag-HIF1 $\alpha$ ). Input represents 1/10 of the lysate used for the immunoprecipitations. Results represent three independent experiments. The proteasome inhibitor MG132 (5 $\mu$ M) was added in these experiments to prevent protein degradation.

**(h)** Myc-tagged USP29 binds endogenous HIF1 $\alpha$ . Plasmids encoding Myc-tagged empty vector or Myc-tagged USP29 were transfected into HEK-293T cells. Anti-Myc antibodies were used to precipitate (IP) Myc-tagged USP29, and the immunoprecipitates were immunoblotted (IB) for Myc (Myc-USP29) and for endogenous HIF1 $\alpha$ . Input represents 1/10 of the lysate used for the immunoprecipitations. Results represent three independent experiments. The proteasome inhibitor MG132 (5 $\mu$ M) was added in these experiments to prevent protein degradation.

Suppl. Figure 4, Gao et al.

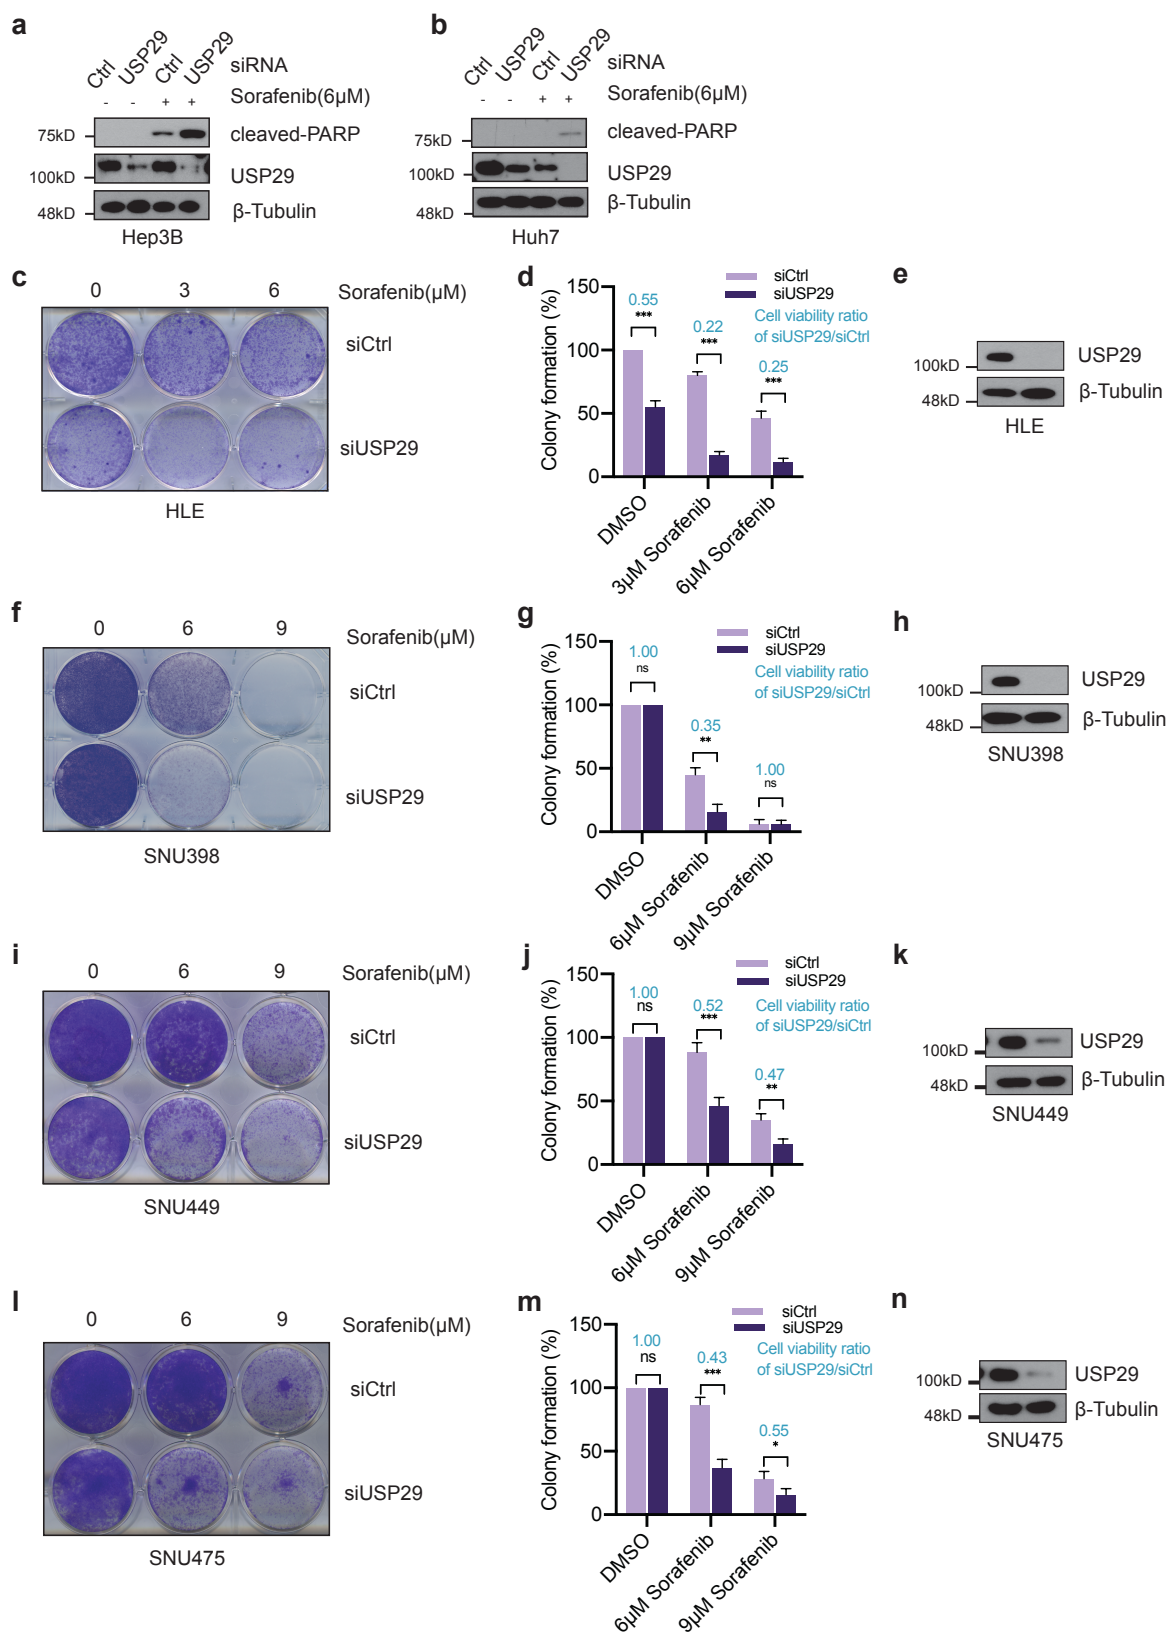

**Suppl. Figure 4. USP29 deficiency promotes Sorafenib-induced cell death in intrinsic Sorafenib-resistant HCC cell lines.**

**(a,b)** Loss of USP29 induces cell death upon Sorafenib treatment in Hep3B and Huh7 cells. Hep3B (a) and Huh7 (b) cells were transfected with siCtrl or ON-TARGET siUSP29 and treated with 6 $\mu$ M Sorafenib for 18 hours. Immunoblotting for cleaved PARP visualizes the levels of apoptosis.  $\beta$ -Tubulin was used as loading control. Results represent three independent experiments.

**(c-n)** USP29 deficiency diminishes cell survival in various Sorafenib-resistant HCC cell lines. Sorafenib-resistant cell lines HLE (c,d,e), SNU398 (f,g,h), SNU449 (i,j,k) and SNU475 (l,m,n) were transfected with siCtrl or ON-TARGET siUSP29 and plated for colony formation assays under treatment with different concentrations of Sorafenib (0 $\mu$ M, 3 $\mu$ M, 6 $\mu$ M or 0 $\mu$ M, 6 $\mu$ M, 9 $\mu$ M) for 2 weeks. Quantification of colony formation by crystal violet staining (d,g,j,m) revealed decreased cell survival upon loss of USP29 expression and Sorafenib treatment in comparison with controls. The ratio of cell viability between USP29-deficient and USP29-wildtype cells is given in blue numbers (d,g,j,m). n = 3 independent replicates. ns = not significant; \*, P < 0.05; \*\*, P < 0.01; \*\*\*, P < 0.001; Student's t-test. Knockdown efficiencies were validated by immunoblotting for USP29 (e,h,k,n).  $\beta$ -Tubulin was used as loading control. Results represent three independent experiments.



## Suppl. Figure 5, Gao et al.

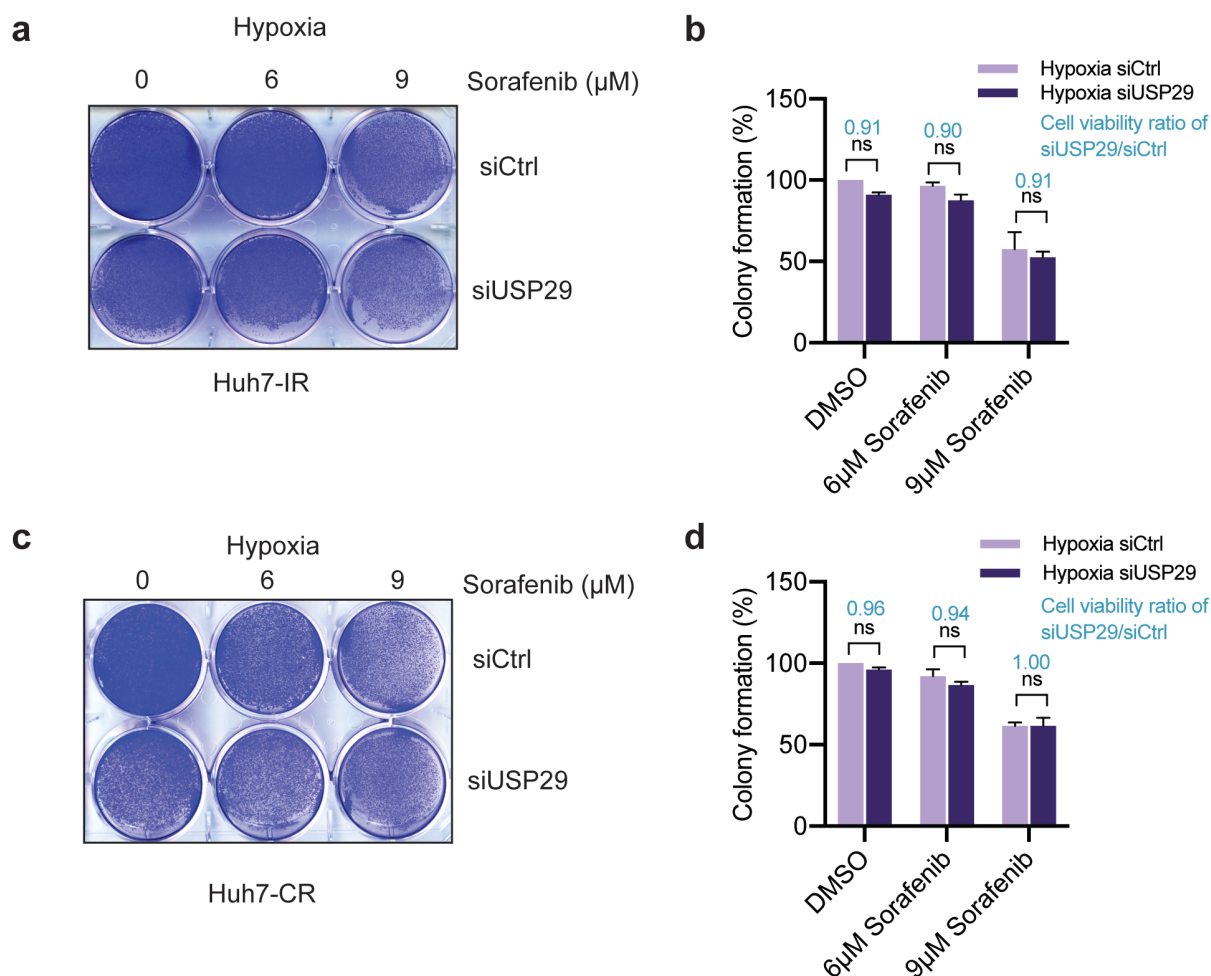

**Suppl. Figure 5. Hypoxia rescues USP29 deficiency induced cell death in response to Sorafenib treatment in Sorafenib-resistant HCC cell lines.**

**(a-d)** Hypoxia rescues USP29 deficiency-induced cell death in response to Sorafenib in Huh7-IR and Huh7-CR cells. Huh7-IR (a) and Huh7-CR (b) cells were transfected with siCtrl or ON-TARGET siUSP29 every two days and plated for colony formation assays under treatment with different concentrations of Sorafenib (0 $\mu\text{M}$ , 6 $\mu\text{M}$ , 9 $\mu\text{M}$ ) under hypoxia culture condition (1% O<sub>2</sub>, 94% N<sub>2</sub>, 5% CO<sub>2</sub>) for 2 weeks, cell medium was refreshed every other day. Quantification of colony formation by crystal violet staining (b,d) revealed no decreased cell survival upon loss of USP29 expression and Sorafenib treatment in comparison with controls. The ratio of cell viability between USP29-deficient and USP29-wildtype cells is given in blue numbers (b,d). n = 3 independent replicates. ns = not significant; Student's t-test.

## Suppl. Figure 6, Gao et al.

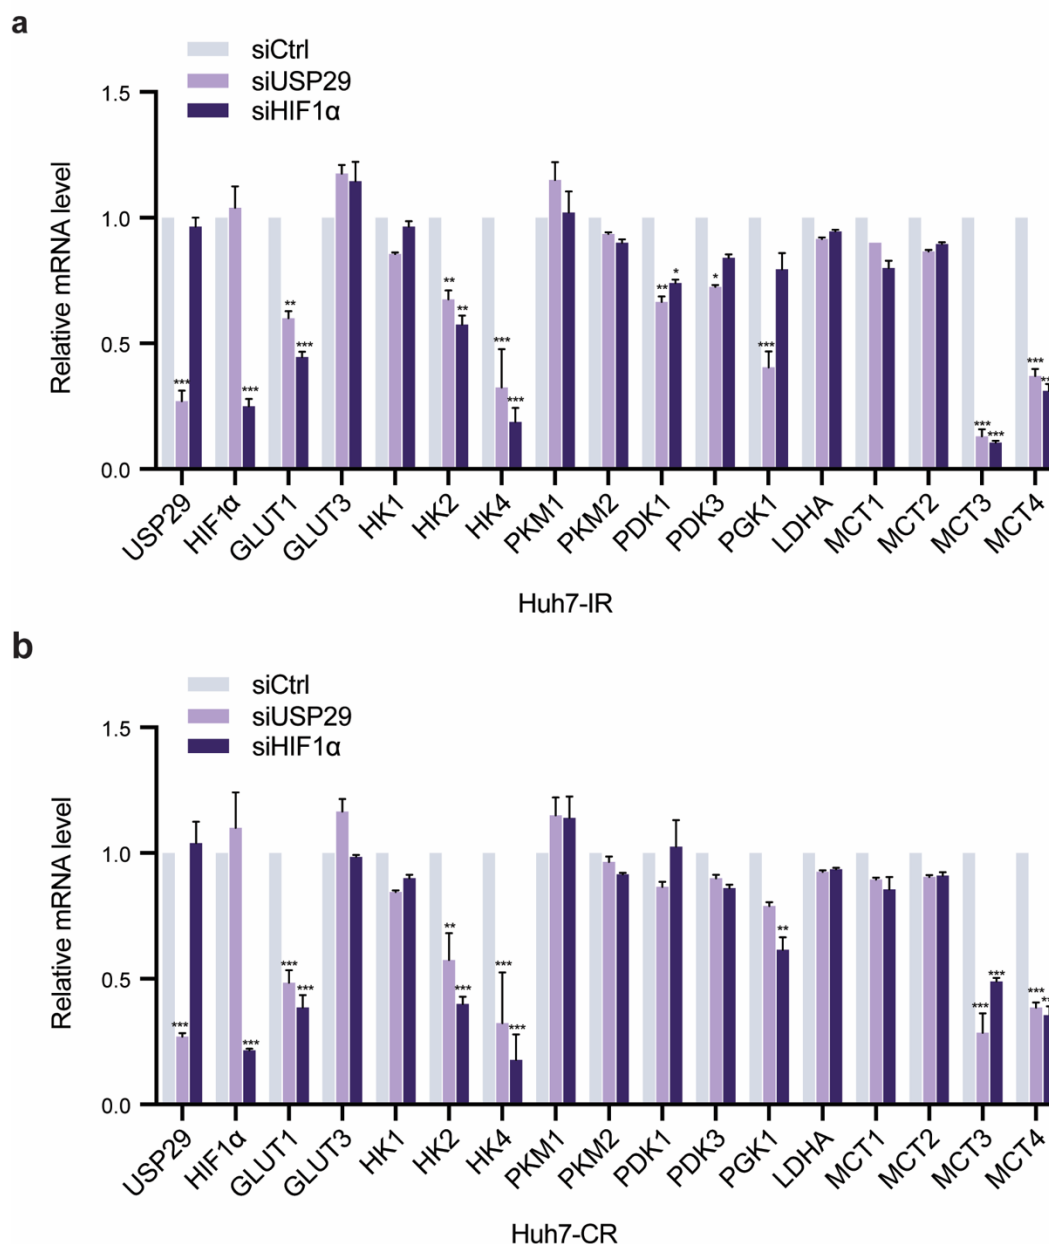**Suppl. Figure 6. The USP29-HIF1 $\alpha$  axis regulates glycolysis in Sorafenib resistant cells.**

**(a,b)** Knockdown of USP29/HIF1 $\alpha$  diminishes the expression of glycolysis-related genes in Sorafenib resistant Huh7-IR (a) and Huh7-CR (b) cells. Transcriptions of glycolysis metabolism were measured by quantitative RT-PCR with siRNA-mediated depletion of either USP29 or HIF1 $\alpha$ . The expression *GLUT1*, *HK2*, *HK4*, *PDK1*, *PDK3*, *PGK1*, *MCT3* and *MCT4* showed decreased mRNA levels upon depletion of USP29 or HIF1 $\alpha$ . n = 3 independent replicates). ns = not significant; \*, P < 0.05; \*\*, P < 0.01; \*\*\*, P < 0.001; Student's t-test.

## Supplementary Tables

### Suppl. Table I. Differential gene expression between Sorafenib-responsive and resistant cells

Excel file representing the differential gene expression between parental Sorafenib-sensitive Huh7 and Hep3B cells and their Sorafenib-resistant derivatives Huh7-IR, Huh7-CR, Hep3B-IR and Hep3B-CR.

### Suppl. Table II. siRNAs used in the study.

|                                  | SOURCE/Sequence (5' --- 3')                                        |
|----------------------------------|--------------------------------------------------------------------|
| siCtrl                           | ON-TARGET plus non-targeting pool (D-001810-10-20)                 |
| siUSP8                           | ON-TARGET plus Human USP8 (L-005203-00-0005)                       |
| siUSP28                          | ON-TARGET plus Human USP28 (L-006076-00-0005)                      |
| siUSP29                          | ON-TARGET plus Human USP29 (L-006077-00-0005)                      |
| siUSP36                          | ON-TARGET plus Human USP36 (L-006084-00-0005)                      |
| siUSP37                          | ON-TARGET plus Human USP37 (L-006085-00-0005)                      |
| siUCHL1                          | ON-TARGET plus Human UCHL1 (L-004309-00-0005)                      |
| siHIF1 $\alpha$                  | ON-TARGET plus Human HIF1A (L-004018-00-0005)                      |
| siHIF2 $\alpha$                  | ON-TARGET plus Human EPAS1 (L-004814-00-0005)                      |
| siUSP29#1                        | CCCAUCAAGUUUAGAGGAUdTdT                                            |
| siUSP29#2                        | GGAAUAUGCUGAAGGAAAUDtT                                             |
| shUSP29-Forward                  | GATCCCCCATCAAGTTTAGAGGATTTCAAGAGAAT<br>CCTCTAAACTTGATGGGTTTTGGAAA  |
| shUSP29-Reverse                  | AGCTTTTCCAAAACCCATCAAGTTTAGAGGATTCTC<br>TTGAAATCCTCTAAACTTGATGGGGG |
| Myc-USP29-RNAi-resistant-Forward | GGAAGAACCCTTCTAGCCTCGAAGACTTAGAAAAAGATA                            |
| Myc-USP29-RNAi-resistant-Reverse | TATCTTTTCTAAGTCTTCGAGGCTAGAAGGGTTCTCC                              |

### Suppl. Table III. Antibodies used in the study.

| Antibodies       | SOURCE     | IDENTIFIER           |
|------------------|------------|----------------------|
| HIF1 $\alpha$    | Novus      | NB100-449            |
| HIF2 $\alpha$    | Novus      | NB100-122            |
| USP29            | Eurogentec | Peptide:1810359-1479 |
| $\beta$ -Tubulin | CST        | 2128                 |
| GLUT1            | Abcam      | ab652                |
| Flag tag         | Sigma      | F1804                |
| Myc tag          | CST        | 2276                 |
| HA tag           | CST        | 2362                 |
| Cleaved-PARP     | CST        | 5625                 |

|                  |       |       |
|------------------|-------|-------|
| Cleaved-caspase3 | CST   | 9661  |
| Ki67             | Abcam | ab833 |

**Suppl. Table IV. Oligonucleotides used in the study.**

| Oligonucleotides               | 5' --- 3'               |
|--------------------------------|-------------------------|
| hRPL19, forward primer         | GATGCCGGAAAAACACCTTG    |
| hPRL19, reverse primer         | TGGCTGTACCCTTCCGCTT     |
| HIF1 $\alpha$ , forward primer | GAACGTCGAAAAGAAAAGTCTCG |
| HIF1 $\alpha$ , reverse primer | CCTTATCAAGATGCGAACTCACA |
| USP29, forward primer          | GGTGCCTCTTGACTCTCATTC   |
| USP29, reverse primer          | TGGGACACCTTGAGTGAGTAAG  |
| GLUT1, forward primer          | TTGCAGGCTTCTCCAACCTGGAC |
| GLUT1, reverse primer          | CAGAACCAGGAGCACAGTGAAG  |
| GLUT3, forward primer          | CAGAACCAGGAGCACAGTGAAG  |
| GLUT3, reverse primer          | TTGAACACCTGCATCCTTGA    |
| HK1, forward primer            | GCCACGATGAACCAAGGAATGG  |
| HK1, reverse primer            | GACAATG TGATCAAACAGCTC  |
| HK2, reverse primer            | GAGTTTGACCTGGATGTGGTTGC |
| HK2, forward primer            | CCTCCATGTAGCAGGCATTGCT  |
| HK4, reverse primer            | CATCTCCGACTTCCTGGACAAG  |
| HK4, forward primer            | GAAGCTGGGGTGCAGCTTGTAC  |
| PKM1, forward primer           | CTATCCTCTGGAGGCTGTGC    |
| PKM1, reverse primer           | CGCACAAGTTCTTCAAACAGC   |
| PKM2, forward primer           | CTATCCTCTGGAGGCTGTGC    |
| PKM2, reverse primer           | GTGGGGTTCGCTGGTAATG     |
| LDHA, forward primer           | GGATCTCCAACATGGCAGCCTT  |
| LDHA, reverse primer           | AGACGGCTTTCTCCCTCTTGCT  |
| PDK1, forward primer           | CATGTCACGCTGGGTAATGAGG  |
| PDK1, reverse primer           | CTCAACACGAGGTCTTGGTGCA  |
| PDK3, forward primer           | TGGAAGGAGTGGGTAATGATGC  |
| PDK3, reverse primer           | GGATTGCTCCAATCATCGGCTTC |
| MCT1, forward primer           | TTGTTGGTGGCTGCTTGTGAGG  |
| MCT1, reverse primer           | TCATGGTCAGAGCTGGATTCAAG |
| MCT2, forward primer           | TGCTGGCTGTTATGTACGCAGG  |
| MCT2, reverse primer           | TGCTGGCTGTTATGTACGCAGG  |
| MCT3, forward primer           | TGCAGTTCGAGGTGCTCATGGC  |
| MCT3, reverse primer           | GTTCTTCAACACATCCACCAGGC |
| MCT4, forward primer           | CGTTCTGGGATGGGACTGAC    |
| MCT4, reverse primer           | ATGTGCCTCTGGACCATGTG    |
| AXL, forward primer            | GTTTGGAGCTGTGATGGAAGGC  |
| AXL, reverse primer            | CGCTTCACTCAGGAAATCCTCC  |
| AHNAK2, forward primer         | GAGAAGGAGGACACGGATGTTGC |

|                        |                         |
|------------------------|-------------------------|
| AHNAK2, reverse primer | CCCCGCTTGCTCTTTATGGATTG |
| VEGFA, forward primer  | AGGGCAGAATCATCACGAAGT   |
| VEGFA, reverse primer  | AGGGTCTCGATTGGATGGCA    |
| USP8, forward primer   | TTCCATTCAATACTTGGACCTGG |
| USP8, reverse primer   | CCAAAGAGCCTTTAGCCAATGT  |
| USP28, forward primer  | CACTGTTGCTACAGAACCATCT  |
| USP28, reverse primer  | TGGGAGACTCCAGTAGACTCA   |
| USP36, forward primer  | TCTGCCAAGAAGGTCCTTTTACA |
| USP36, reverse primer  | TGGCGACTAGCTCCCTCTG     |
| USP37, forward primer  | CCAGTGGAGCGAAACAAAGC    |
| USP37, reverse primer  | CCTCTGCATCCTTACTTGGTACT |
| UCHL1, forward primer  | CCTGTGGCACAATCGGACTTA   |
| UCHL1, reverse primer  | CATCTACCCGACATTGGCCTT   |
